# Supplementary material for: SILGGM: An extensive R package for efficient statistical inference in large-scale gene networks
Source: PubMed Central journal article supplement (PMC6107288; doi:10.1371/journal.pcbi.1006369), 2018-08-13
Supplement: pcbi.1006369.s003.pdf [file pcbi.1006369.s003.pdf]

### S3 Appendix. The package installation

- Windows users should install “Rtools” before installation of this package.
- The package SILGGM is available on CRAN and can be installed using the following R commands:

```
install.packages(“Rcpp”)
```

```
install.packages(“SILGGM”)
```

The first line can be omitted if “install dependencies” is checked in the R package installer.

- When the source code file “SILGGM\_1.0.0.tar.gz” is downloaded from CRAN, the package can also be installed:

```
install.packages(“Rcpp”)
```

```
install.packages(pkgs = “SILGGM_1.0.0.tar.gz”, repos = NULL, type =  
“source”)
```
