# Supplementary material for: SILGGM: An extensive R package for efficient statistical inference in large-scale gene networks
Source: PubMed Central journal article supplement (PMC6107288; doi:10.1371/journal.pcbi.1006369), 2018-08-13
Supplement: pcbi.1006369.s004.pdf [file pcbi.1006369.s004.pdf]

## S1 File. The graph settings for time evaluation in simulation studies

### 1. The graph settings for time evaluation on the implementation of GFC\_L

- **Band graph:** a  $p$  by  $p$  precision matrix  $\Omega = (\omega_{ij})_{p \times p}$  with  $\omega_{i,i+1} = \omega_{i+1,i} = 0.6$ ,  $\omega_{i,i+2} = \omega_{i+2,i} = 0.3$  and the other off-diagonal elements  $\omega_{ij} = 0$  for  $|i - j| \geq 3$ . The diagonal entries of  $\Omega$  are  $\omega_{ii} = 1$  for  $i = 1, 2, 3, \dots, p$ . The expected node degree of the graph is 4.
- **Hub graph:** an initial  $p$  by  $p$  matrix  $\Omega' = (\omega_{ij})_{p \times p}$  with  $\omega_{ij} = \omega_{ji} = 0.5$  for  $i = 10(r - 1) + 1$ ,  $10(r - 1) + 2 \leq j \leq 10(r - 1) + 10$  and  $1 \leq r \leq p/10$  and the other off-diagonal entries of 0. The diagonal entries of  $\Omega'$  are  $\omega_{ii} = 1$  for  $i = 1, 2, 3, \dots, p$ . To make the matrix positive definite, the final precision matrix is  $\Omega = \Omega' + (|\lambda_{min}| + 0.05)I_p$ , where  $\lambda_{min}$  is the minimum eigenvalue of  $\Omega'$  and  $I_p$  is a  $p$  by  $p$  identity matrix. For  $p/10$  variables or nodes in the graph, the expected node degree is 10.
- **E-R graph:** an initial  $p$  by  $p$  matrix  $\Omega' = (\omega_{ij})_{p \times p}$  with each off-diagonal entry  $\omega_{ij} = \omega_{ji} = \mu_{ij} * \varphi_{ij}$ , where  $\mu_{ij}$  is a uniform random variable between 0.4 and 0.8 and  $\varphi_{ij}$  is a Bernoulli random variable (1 means success and 0 means failure) with the success probability of  $\min(0.05, 5/p)$ . The diagonal entries of  $\Omega'$  are  $\omega_{ii} = 1$  for  $i = 1, 2, 3, \dots, p$ . To make the matrix positive definite, the final precision matrix is  $\Omega = \Omega' + (|\lambda_{min}| + 0.05)I_p$ , where  $\lambda_{min}$  is the minimum eigenvalue of  $\Omega'$  and  $I_p$  is a  $p$  by  $p$  identity matrix. The expected node degree is 5

if  $p \geq 100$ ; otherwise, it is  $0.05p$ .

2. The graph setting for time evaluation on the implementation of B\_NW\_SL

- **E-R graph:** an initial  $p$  by  $p$  matrix  $\Omega' = (\omega_{ij})_{p \times p}$  with each off-diagonal entry  $\omega_{ij} = \omega_{ji} =$  a value randomly picked from the set  $\{0.3, 0.6, 1\}$ , where the probability of each  $\omega_{ij} = \omega_{ji} \neq 0$  is  $\pi$ . The diagonal entries of  $\Omega'$  are all set as 4. Then, all the elements including the diagonals in the bottom right block with a size of  $p/2 \times p/2$  in  $\Omega'$  are multiplied by 2. The final precision matrix is now denoted as  $\Omega$ . The expected node degree of the graph is  $\pi p$ .
