# Supplementary material for: SILGGM: An extensive R package for efficient statistical inference in large-scale gene networks
Source: PubMed Central journal article supplement (PMC6107288; doi:10.1371/journal.pcbi.1006369), 2018-08-13
Supplement: pcbi.1006369.s005.pdf [file pcbi.1006369.s005.pdf]

## S2 File. Testing on the accuracy of individual inference

In this supplementary file, we present the details of evaluation on the accuracy of individual inference of each  $\omega_{ij}$  (or gene pair) for the cases with  $n = 800$ ,  $p = 5000$  and  $n = 800$ ,  $p = 10000$ . We consider three graph settings described as below:

- **Band graph:** a  $p$  by  $p$  precision matrix  $\Omega = (\omega_{ij})_{p \times p}$  with  $\omega_{i,i+1} = \omega_{i+1,i} = 0.6$ ,  $\omega_{i,i+2} = \omega_{i+2,i} = 0.3$  and the other off-diagonal elements  $\omega_{ij} = 0$  for  $|i - j| \geq 3$ . The diagonal entries of  $\Omega$  are  $\omega_{ii} = 1$  for  $i = 1, 2, 3, \dots, p$ . The expected node degree of the graph is 4.
- **E-R graph:** we start with an initial  $p$  by  $p$  matrix  $\Omega' = (\omega_{ij})_{p \times p}$  with each off-diagonal entry  $\omega_{ij} = \omega_{ji} = \mu_{ij} * \varphi_{ij}$ , where  $\mu_{ij}$  is a uniform random variable between 0.4 and 0.8 and  $\varphi_{ij}$  is a Bernoulli random variable (1 means success and 0 means failure) with the success probability of  $\min(0.05, 5/p)$ . The diagonal entries of  $\Omega'$  are  $\omega_{ii} = 1$  for  $i = 1, 2, 3, \dots, p$ . To make the matrix positive definite, the final precision matrix is  $\Omega = \Omega' + (|\lambda_{min}| + 0.05)I_p$ , where  $\lambda_{min}$  is the minimum eigenvalue of  $\Omega'$  and  $I_p$  is a  $p$  by  $p$  identity matrix. The expected node degree of the graph is 5 for  $p = 5000$  or 10000.
- **Scale-free graph:** By using the preferential attachment scheme, we start with a single node (or gene) and no edges in the first time step. Then, in each time step, a new gene is added, and the newly-added gene initiates an edge to one of the old genes. An old gene  $i$  is selected based on the probability  $p(i) \propto d(i)^{0.01} + 1$ , where  $d(i)$  is the node degree of gene

$i$  in the current time step and 0.01 is the power of the preferential attachment. Therefore, the total number of edges in the entire generated graph is given by  $p - 1$ . The above procedure is achieved by the implementation of the function `barabasi.game()` in the R package `igraph`. Therefore, we generate a  $p$  by  $p$  adjacency matrix  $A = (a_{ij})_{p \times p}$  with each off-diagonal element  $a_{ij} = 1$  if there is a non-zero partial correlation between gene  $i$  and  $j$ ; otherwise,  $a_{ij} = 0$ . The diagonal elements of  $A$  are all equal to 0. Then, we generate an initial  $p$  by  $p$  matrix  $\Omega' = (\omega_{ij})_{p \times p}$  and set any off-diagonal element  $\omega_{ij} = 0.3$  if its corresponding  $a_{ij} = 1$ . To make the matrix positive definite, the final precision matrix is  $\Omega = \Omega' + (|\lambda_{min}| + 0.2)I_p$ , where  $\lambda_{min}$  is the minimum eigenvalue of  $\Omega'$  and  $I_p$  is a  $p$  by  $p$  identity matrix. The following histograms in Fig. A show that the node degree distribution of Scale-free graph for  $p = 5000$  and  $p = 10000$  follows a power law.

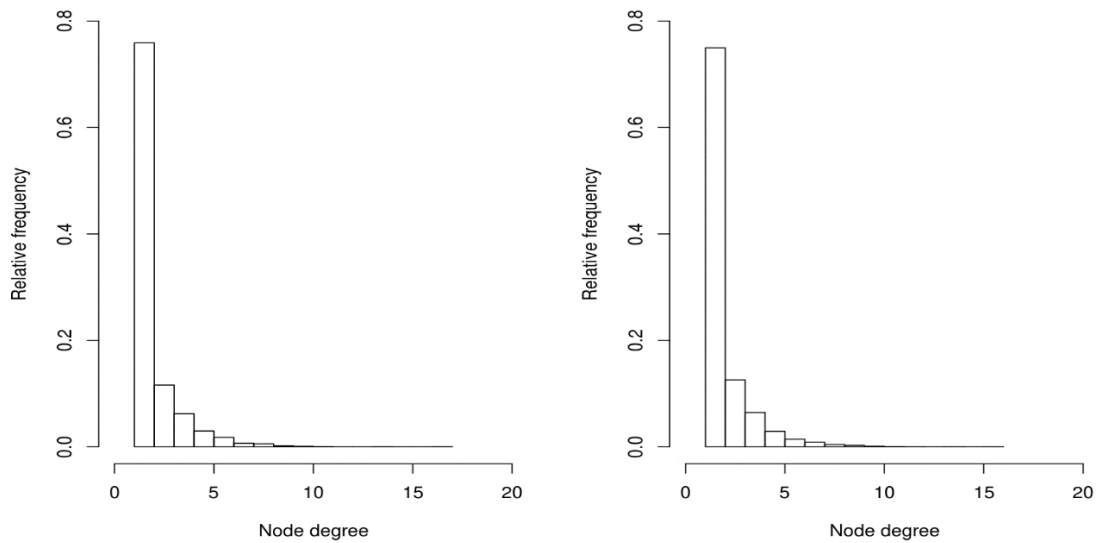

**Fig. A. Histograms of node degrees of Scale-free graph.** The left plot illustrates the case of  $p = 5000$ , and the right plot shows the node degree distribution when  $p = 10000$ .

Under each of the three graph settings, we simulate 100 data sets. We customize GFC\_L to be implemented among 5 candidates of tuning parameters for tuning selection, and the other approaches in SILGGM are run with default parameters. We set a pre-specified level of 0.05 on the estimated p-value of each  $\omega_{ij}$ . In terms of the estimated p-values of all  $\omega_{ij}$ 's in an entire graph, the mean of the estimated Type I error under the 0.05 level and the corresponding mean of the estimated Type II error over the 100 replications for Band graph, E-R graph and Scale-free graph are reported in the following three tables respectively. The results indicate that all the approaches control the Type I error well in these large scales ( $p = 5000/p = 10000$ ) for individual testing on each gene pair. Also, a non-zero partial correlation can be correctly identified in the case of either  $p = 5000$  or  $p = 10000$  since the corresponding Type II error for all the simulation settings are around 0.

| Graph setting | Average node degree | $p$   | $n$ | Methods   | Type I error (0.05 level) | Type II error |
|---------------|---------------------|-------|-----|-----------|---------------------------|---------------|
| Band          | 3.9988              | 5000  | 800 | B_NW_SL   | 0.0496                    | 0             |
|               |                     |       |     | D-S_NW_SL | 0.0228                    | 0             |
|               |                     |       |     | D-S_GL    | 0.0006                    | 0             |
|               |                     |       |     | GFC_SL    | 0.0501                    | 0             |
|               |                     |       |     | GFC_L     | 0.0503                    | 0             |
|               | 3.9994              | 10000 | 800 | B_NW_SL   | 0.0496                    | 0             |
|               |                     |       |     | D-S_NW_SL | 0.0221                    | 0             |
|               |                     |       |     | D-S_GL    | 0.0002                    | 0             |
|               |                     |       |     | GFC_SL    | 0.0501                    | 0             |
|               |                     |       |     | GFC_L     | 0.0502                    | 0             |

| Graph setting | Average node degree | $p$   | $n$ | Methods   | Type I error (0.05 level) | Type II error        |
|---------------|---------------------|-------|-----|-----------|---------------------------|----------------------|
| E-R           | 5.0356              | 5000  | 800 | B_NW_SL   | 0.0496                    | $9.4 \times 10^{-4}$ |
|               |                     |       |     | D-S_NW_SL | 0.0280                    | $1.6 \times 10^{-3}$ |
|               |                     |       |     | D-S_GL    | 0.0315                    | $8.0 \times 10^{-4}$ |
|               |                     |       |     | GFC_SL    | 0.0501                    | $9.3 \times 10^{-4}$ |
|               |                     |       |     | GFC_L     | 0.0501                    | $1.3 \times 10^{-3}$ |
|               | 4.9704              | 10000 | 800 | B_NW_SL   | 0.0496                    | $6.0 \times 10^{-4}$ |
|               |                     |       |     | D-S_NW_SL | 0.0276                    | $1.1 \times 10^{-3}$ |
|               |                     |       |     | D-S_GL    | 0.0300                    | $5.6 \times 10^{-4}$ |
|               |                     |       |     | GFC_SL    | 0.0501                    | $6.0 \times 10^{-4}$ |
|               |                     |       |     | GFC_L     | 0.0501                    | $8.9 \times 10^{-4}$ |

| Graph setting | Average node degree | $p$   | $n$ | Methods   | Type I error (0.05 level) | Type II error        |
|---------------|---------------------|-------|-----|-----------|---------------------------|----------------------|
| Scale-free    | 1.9996              | 5000  | 800 | B_NW_SL   | 0.0495                    | $5.6 \times 10^{-5}$ |
|               |                     |       |     | D-S_NW_SL | 0.0427                    | $6.0 \times 10^{-5}$ |
|               |                     |       |     | D-S_GL    | 0.0415                    | $5.8 \times 10^{-5}$ |
|               |                     |       |     | GFC_SL    | 0.0501                    | $5.4 \times 10^{-5}$ |
|               |                     |       |     | GFC_L     | 0.0501                    | $4.8 \times 10^{-5}$ |
|               | 1.9998              | 10000 | 800 | B_NW_SL   | 0.0495                    | $7.0 \times 10^{-5}$ |
|               |                     |       |     | D-S_NW_SL | 0.0432                    | $8.0 \times 10^{-5}$ |
|               |                     |       |     | D-S_GL    | 0.0431                    | $8.0 \times 10^{-5}$ |
|               |                     |       |     | GFC_SL    | 0.0501                    | $7.0 \times 10^{-5}$ |
|               |                     |       |     | GFC_L     | 0.0501                    | $6.0 \times 10^{-5}$ |

The above validation with Type I and Type II errors for individual inference of whether a known zero or a non-zero partial correlation can be correctly identified based on the information of p-values implies no differences among all the approaches. To make a further comparison for individual inference, we then evaluate the average empirical coverage probabilities for the 95% confidence intervals of the  $\omega_{ij}$ 's for the “non-zero partial correlation” set  $S_0$  (a set of all pairs with non-zero  $\omega_{ij}$ 's) and the “zero partial correlation” set  $S_0^c$  (a set of all pairs with zero  $\omega_{ij}$ 's) respectively.

Based on the same 100 replications, we report the mean of the 100 estimated average coverage probabilities of the 95% confidence intervals of the  $\omega_{ij}$ 's in  $S_0$  and the mean of the 100 estimated average coverage probabilities of the 95% confidence intervals of the  $\omega_{ij}$ 's in  $S_0^c$  for Band graph, E-R graph and Scale-free graph in the following three tables respectively.

| Graph setting | Average node degree | $p$   | $n$ | Methods   | $S_0$  | $S_0^c$ |
|---------------|---------------------|-------|-----|-----------|--------|---------|
| Band          | 3.9988              | 5000  | 800 | B_NW_SL   | 0.9505 | 0.9504  |
|               |                     |       |     | D-S_NW_SL | 0.7864 | 0.9772  |
|               |                     |       |     | D-S_GL    | 0.5355 | 0.9994  |
|               | 3.9994              | 10000 | 800 | B_NW_SL   | 0.9496 | 0.9504  |
|               |                     |       |     | D-S_NW_SL | 0.7368 | 0.9779  |
|               |                     |       |     | D-S_GL    | 0.5538 | 0.9998  |

| Graph setting | Average node degree | $p$   | $n$ | Methods   | $S_0$  | $S_0^c$ |
|---------------|---------------------|-------|-----|-----------|--------|---------|
| E-R           | 5.0356              | 5000  | 800 | B_NW_SL   | 0.8588 | 0.9504  |
|               |                     |       |     | D-S_NW_SL | 0.9454 | 0.9720  |
|               |                     |       |     | D-S_GL    | 0.7967 | 0.9685  |
|               | 4.9704              | 10000 | 800 | B_NW_SL   | 0.8452 | 0.9504  |
|               |                     |       |     | D-S_NW_SL | 0.9448 | 0.9724  |
|               |                     |       |     | D-S_GL    | 0.7801 | 0.9700  |

| Graph setting | Average node degree | $p$   | $n$ | Methods   | $S_0$  | $S_0^c$ |
|---------------|---------------------|-------|-----|-----------|--------|---------|
| Scale-free    | 1.9996              | 5000  | 800 | B_NW_SL   | 0.9330 | 0.9505  |
|               |                     |       |     | D-S_NW_SL | 0.9459 | 0.9573  |
|               |                     |       |     | D-S_GL    | 0.9354 | 0.9585  |
|               | 1.9998              | 10000 | 800 | B_NW_SL   | 0.9361 | 0.9505  |
|               |                     |       |     | D-S_NW_SL | 0.9467 | 0.9568  |
|               |                     |       |     | D-S_GL    | 0.9397 | 0.9569  |

Since GFC\_SL or GFC\_L provides no confidence intervals, we involve the other three approaches here. As it can be seen, the results of empirical coverage probabilities in  $S_0^c$  coincide the ones in Type I error rates and they are all good with our desired level 0.95. For Scale-free graph with  $p = 5000$  and  $10000$ , the empirical coverage probabilities of the three methods in  $S_0$  are all around 0.95 as well. However, there are some differences in  $S_0$  for Band graph and E-R graph. For Band graph, B\_NW\_SL particularly outperforms D-S\_NW\_SL and D-S\_GL since its empirical coverage probabilities in  $S_0$  are well around the desired level, while the empirical coverage probabilities of D-S\_NW\_SL in  $S_0$  are less than 0.80 and the results of D-S\_GL in  $S_0$  are around 0.55. For E-R graph, D-S\_NW\_SL is the best one with the empirical coverage probabilities in  $S_0$  close to the desired level, but the differences in results among the three methods are much less significant than the ones in Band graph. The empirical coverage probabilities of B\_NW\_SL in  $S_0$  are still around 0.85, and the results of D-S\_GL can be around 0.80 as well.

According to the results from the three graph settings, the overall performance of the confidence intervals among the three methods are good since  $S_0^c$  is a major part of the sparse graph settings. But in terms of the confidence intervals in  $S_0$  or the non-zero partial correlations, B\_NW\_SL and D-S\_NW\_SL perform better than D-S\_GL. Moreover, the performance of B\_NW\_SL is more stable than that of D-S\_NW\_SL.
