# Supplementary material for: SILGGM: An extensive R package for efficient statistical inference in large-scale gene networks
Source: PubMed Central journal article supplement (PMC6107288; doi:10.1371/journal.pcbi.1006369), 2018-08-13
Supplement: pcbi.1006369.s006.pdf [file pcbi.1006369.s006.pdf]

### S3 File. Testing on the accuracy of global inference

In this supplementary file, we show the details of evaluation on the accuracy of global inference which requires a simultaneous testing on all  $\omega_{ij}$ 's (or gene pairs) with  $H_0: \omega_{ij} = 0$  vs.  $H_1: \omega_{ij} \neq 0$  for  $1 \leq i < j \leq p$ . We consider the same three graph settings as shown in S2 File:

- **Band graph:** a  $p$  by  $p$  precision matrix  $\Omega = (\omega_{ij})_{p \times p}$  with  $\omega_{i,i+1} = \omega_{i+1,i} = 0.6$ ,  $\omega_{i,i+2} = \omega_{i+2,i} = 0.3$  and the other off-diagonal elements  $\omega_{ij} = 0$  for  $|i - j| \geq 3$ . The diagonal entries of  $\Omega$  are  $\omega_{ii} = 1$  for  $i = 1, 2, 3, \dots, p$ . The expected node degree of the graph is 4.
- **E-R graph:** we start with an initial  $p$  by  $p$  matrix  $\Omega' = (\omega_{ij})_{p \times p}$  with each off-diagonal entry  $\omega_{ij} = \omega_{ji} = \mu_{ij} * \varphi_{ij}$ , where  $\mu_{ij}$  is a uniform random variable between 0.4 and 0.8 and  $\varphi_{ij}$  is a Bernoulli random variable (1 means success and 0 means failure) with the success probability of  $\min(0.05, 5/p)$ . The diagonal entries of  $\Omega'$  are  $\omega_{ii} = 1$  for  $i = 1, 2, 3, \dots, p$ . To make the matrix positive definite, the final precision matrix is  $\Omega = \Omega' + (|\lambda_{min}| + 0.05)I_p$ , where  $\lambda_{min}$  is the minimum eigenvalue of  $\Omega'$  and  $I_p$  is a  $p$  by  $p$  identity matrix. The expected node degree of the graph is 5 for  $p = 5000$  or 10000.
- **Scale-free graph:** By using the preferential attachment scheme, we start with a single node (or gene) and no edges in the first time step. Then, in each time step, a new gene is added, and the newly-added gene initiates an edge to one of the old genes. An old gene  $i$  is selected based on the

probability  $p(i) \propto d(i)^{0.01} + 1$ , where  $d(i)$  is the node degree of gene  $i$  in the current time step and 0.01 is the power of the preferential attachment. Therefore, the total number of edges in the entire generated graph is given by  $p - 1$ . The above procedure is achieved by the implementation of the function `barabasi.game()` in the R package `igraph`. Therefore, we generate a  $p$  by  $p$  adjacency matrix  $A = (a_{ij})_{p \times p}$  with each off-diagonal element  $a_{ij} = 1$  if there is a non-zero partial correlation between gene  $i$  and  $j$ ; otherwise,  $a_{ij} = 0$ . The diagonal elements of  $A$  are all equal to 0. Then, we generate an initial  $p$  by  $p$  matrix  $\Omega' = (\omega_{ij})_{p \times p}$  and set any off-diagonal element  $\omega_{ij} = 0.3$  if its corresponding  $a_{ij} = 1$ . To make the matrix positive definite, the final precision matrix is  $\Omega = \Omega' + (|\lambda_{min}| + 0.2)I_p$ , where  $\lambda_{min}$  is the minimum eigenvalue of  $\Omega'$  and  $I_p$  is a  $p$  by  $p$  identity matrix. The following histograms in Fig. A show that the node degree distribution of Scale-free graph for  $p = 5000$  and  $p = 10000$  follows a power law.

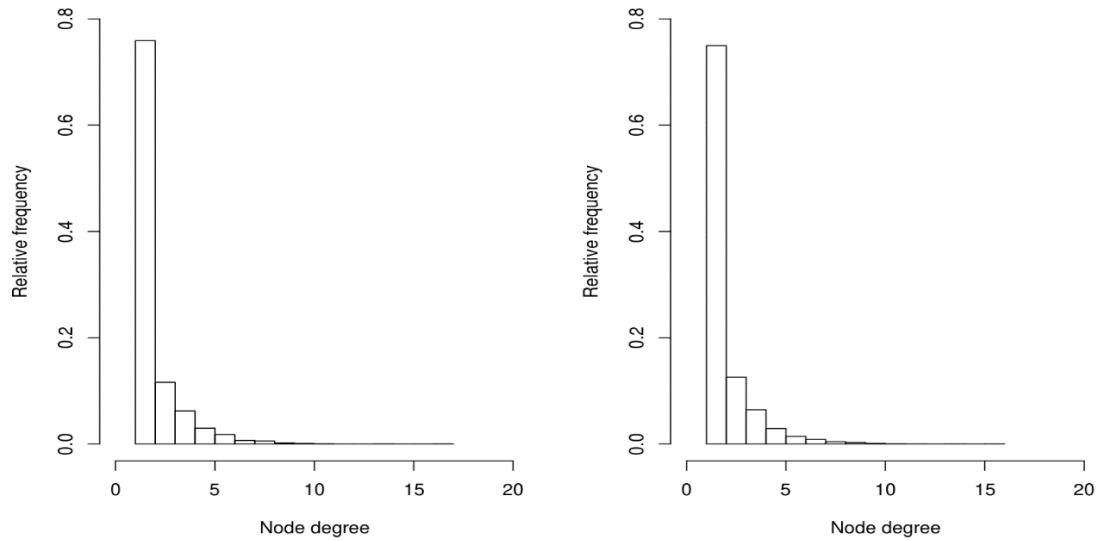

**Fig. A. Histograms of node degrees of Scale-free graph.** The left plot illustrates the case of  $p = 5000$ , and the right plot shows the node degree distribution when  $p = 10000$ .

As for accuracy metrics, we use false discovery rate (FDR), power and the Matthews correlation coefficient (MCC). FDR is the expected proportion of false “discoveries” (the number of incorrect rejections on  $H_0$ 's) among the total “discoveries” (the total number of rejections on  $H_0$ 's). We need to control FDR to avoid the inflation of false positives through global inference. The details of the FDR procedure can be referred to S1 Appendix. As the second measure, the corresponding power is to show to what extent that the total number of true non-zero partial correlations can be correctly identified through the FDR procedure. Besides FDR and the corresponding power, we also consider MCC as the third measure. Here, MCC is used to gauge how well the known zero partial correlations and the known non-zero partial correlations can be correctly identified through the FDR procedure. It is well known that MCC is even robust to class imbalances, so it tailors to our sparse graph settings which have far more

the zero partial correlations than the non-zero partial correlations. Note that MCC lies in the interval between -1 and 1. A value of 1 indicates a perfect selection of all the known zero and the non-zero partial correlations, while a value of -1 implies a total disagreement between prediction and the true partial correlations. A value of 0 means a random guess. Therefore, a closer value of MCC to 1 suggests a better identification of the overall zero and non-zero partial correlations.

For each of the three graph settings, we use the same 100 simulated datasets as used in S2 File. When implementing all the approaches, we set the argument  $\alpha = 0.05$  to denote a pre-specified level of 0.05 for FDR control. We further set the argument  $\text{global} = \text{TRUE}$  when implementing D-S\_NW\_SL, D-S\_GL and B\_NW\_SL to include global inference. In addition, we customize GFC\_L to be implemented among 5 candidates of tuning parameters for tuning selection. With the 100 simulated data sets and the pre-specified level of FDR set at  $\alpha = 0.05$ , the empirical FDRs of all the graph settings for  $p = 5000$  and  $p = 10000$ , the corresponding mean power values and the corresponding average MCCs are reported in the following three tables.

| Graph setting | Average node degree | $p$   | $n$ | Methods   | FDR (0.05 level) | Power  | MCC    |
|---------------|---------------------|-------|-----|-----------|------------------|--------|--------|
| Band          | 3.9988              | 5000  | 800 | B_NW_SL   | 0.0386           | 1.0000 | 0.9805 |
|               |                     |       |     | D-S_NW_SL | 0.0024           | 1.0000 | 0.9988 |
|               |                     |       |     | D-S_GL    | 0.0098           | 1.0000 | 0.9951 |
|               |                     |       |     | GFC_SL    | 0.0365           | 1.0000 | 0.9816 |
|               |                     |       |     | GFC_L     | 0.0470           | 1.0000 | 0.9762 |
|               | 3.9994              | 10000 | 800 | B_NW_SL   | 0.0370           | 1.0000 | 0.9813 |
|               |                     |       |     | D-S_NW_SL | 0.0021           | 1.0000 | 0.9989 |
|               |                     |       |     | D-S_GL    | 0.0139           | 0.9993 | 0.9927 |
|               |                     |       |     | GFC_SL    | 0.0362           | 1.0000 | 0.9817 |
|               |                     |       |     | GFC_L     | 0.0466           | 1.0000 | 0.9764 |

| Graph setting | Average node degree | $p$   | $n$ | Methods   | FDR (0.05 level) | Power  | MCC    |
|---------------|---------------------|-------|-----|-----------|------------------|--------|--------|
| E-R           | 5.0356              | 5000  | 800 | B_NW_SL   | 0.0385           | 0.9236 | 0.9423 |
|               |                     |       |     | D-S_NW_SL | 0.0093           | 0.8941 | 0.9411 |
|               |                     |       |     | D-S_GL    | 0.0149           | 0.9199 | 0.9519 |
|               |                     |       |     | GFC_SL    | 0.0371           | 0.9156 | 0.9389 |
|               |                     |       |     | GFC_L     | 0.0328           | 0.9014 | 0.9337 |
|               | 4.9704              | 10000 | 800 | B_NW_SL   | 0.0371           | 0.9211 | 0.9417 |
|               |                     |       |     | D-S_NW_SL | 0.0078           | 0.8874 | 0.9383 |
|               |                     |       |     | D-S_GL    | 0.0122           | 0.9105 | 0.9483 |
|               |                     |       |     | GFC_SL    | 0.0371           | 0.9129 | 0.9375 |
|               |                     |       |     | GFC_L     | 0.0325           | 0.8962 | 0.9311 |

| Graph setting | Average node degree | $p$   | $n$ | Methods   | FDR (0.05 level) | Power  | MCC    |
|---------------|---------------------|-------|-----|-----------|------------------|--------|--------|
| Scale-free    | 1.9996              | 5000  | 800 | B_NW_SL   | 0.0361           | 0.9367 | 0.9502 |
|               |                     |       |     | D-S_NW_SL | 0.0296           | 0.9334 | 0.9517 |
|               |                     |       |     | D-S_GL    | 0.0234           | 0.9310 | 0.9535 |
|               |                     |       |     | GFC_SL    | 0.0438           | 0.9424 | 0.9493 |
|               |                     |       |     | GFC_L     | 0.0454           | 0.9472 | 0.9509 |
|               | 1.9998              | 10000 | 800 | B_NW_SL   | 0.0341           | 0.8809 | 0.9224 |
|               |                     |       |     | D-S_NW_SL | 0.0293           | 0.8761 | 0.9222 |
|               |                     |       |     | D-S_GL    | 0.0251           | 0.8739 | 0.9230 |
|               |                     |       |     | GFC_SL    | 0.0445           | 0.8929 | 0.9237 |
|               |                     |       |     | GFC_L     | 0.0454           | 0.8986 | 0.9262 |

As we can see, the FDRs of all the methods for the three graph settings are effectively controlled below the desired 0.05 level for both  $p = 5000$  and  $p = 10000$ . In terms of Band graph, almost all the power values are 1 such that the non-zero partial correlations can be correctly identified under the well-controlled FDRs. MCCs of all the methods are close to 1, indicating a near-perfect identification of the overall zero and non-zero partial correlations. For E-R graph, all the approaches have comparable results of power and MCC, and the performance of B\_NW\_SL is slightly

better considering both power and MCC. Similarly, the results of power and MCC of all the methods are also very close for Scale-free graph, and the performance of GFC\_L is slightly better according to power and MCC. Even though the overall results are slightly worse for E-R graph and Scale-free graph due to their far more randomized structures than Band graph, all the methods still show high values of power and MCC even in the cases of  $p = 10000$ . When  $p = 10000$ , all the power values are around 0.90, and the MCCs are about 0.95 for E-R graph. For Scale-free graph, the power values of all the methods are almost 0.90, and the MCCs are still more than 0.92. Among the three graph settings, even though the FDRs of D-S\_NW\_SL and D-S\_GL are controlled more conservatively below the desired level, their power values and MCCs do not suffer a noticeably negative impact, and some results are even better compared to the other approaches in some particular settings. Therefore, all the approaches have shown good performance in correctly identifying the zero and the non-zero partial correlations in a global sense even for the very high-dimensional scenarios.

In addition, we have also clarified the mean numbers of false positives (incorrect rejections on the true  $H_0$ 's) of each approach and the corresponding mean false positive rates (the proportions of false positives among the true  $H_0$ 's) in the previous benchmarking with the FDR procedure in the following three tables based on the 100 replications. We can see from the tables that all the false positive rates are close to 0. In other words, the observed false positive numbers are acceptable given the huge number of true negatives (true  $H_0$ 's).

| Graph setting | Average node degree | $p$   | $n$ | Methods   | Number of false positives | False positive rate  |
|---------------|---------------------|-------|-----|-----------|---------------------------|----------------------|
| Band          | 3.9988              | 5000  | 800 | B_NW_SL   | 401.8                     | $3.2 \times 10^{-5}$ |
|               |                     |       |     | D-S_NW_SL | 24.1                      | $1.9 \times 10^{-6}$ |
|               |                     |       |     | D-S_GL    | 98.7                      | $7.9 \times 10^{-6}$ |
|               |                     |       |     | GFC_SL    | 378.7                     | $3.0 \times 10^{-5}$ |
|               |                     |       |     | GFC_L     | 493.3                     | $4.0 \times 10^{-5}$ |
|               | 3.9994              | 10000 | 800 | B_NW_SL   | 768.7                     | $1.5 \times 10^{-5}$ |
|               |                     |       |     | D-S_NW_SL | 42.3                      | $8.5 \times 10^{-7}$ |
|               |                     |       |     | D-S_GL    | 282.5                     | $5.7 \times 10^{-6}$ |
|               |                     |       |     | GFC_SL    | 751.8                     | $1.5 \times 10^{-5}$ |
|               |                     |       |     | GFC_L     | 976.5                     | $2.0 \times 10^{-5}$ |

| Graph setting | Average node degree | $p$   | $n$ | Methods   | Number of false positives | False positive rate  |
|---------------|---------------------|-------|-----|-----------|---------------------------|----------------------|
| E-R           | 5.0356              | 5000  | 800 | B_NW_SL   | 466.1                     | $3.7 \times 10^{-5}$ |
|               |                     |       |     | D-S_NW_SL | 105.3                     | $8.4 \times 10^{-6}$ |
|               |                     |       |     | D-S_GL    | 175.0                     | $1.4 \times 10^{-5}$ |
|               |                     |       |     | GFC_SL    | 443.6                     | $3.6 \times 10^{-5}$ |
|               |                     |       |     | GFC_L     | 384.6                     | $3.1 \times 10^{-5}$ |
|               | 4.9704              | 10000 | 800 | B_NW_SL   | 882.1                     | $1.8 \times 10^{-5}$ |
|               |                     |       |     | D-S_NW_SL | 172.7                     | $3.5 \times 10^{-6}$ |
|               |                     |       |     | D-S_GL    | 278.7                     | $5.6 \times 10^{-6}$ |
|               |                     |       |     | GFC_SL    | 875.0                     | $1.8 \times 10^{-5}$ |
|               |                     |       |     | GFC_L     | 748.9                     | $1.5 \times 10^{-5}$ |

| Graph setting | Average node degree | $p$   | $n$ | Methods   | Number of false positives | False positive rate  |
|---------------|---------------------|-------|-----|-----------|---------------------------|----------------------|
| Scale-free    | 1.9996              | 5000  | 800 | B_NW_SL   | 175.5                     | $1.4 \times 10^{-5}$ |
|               |                     |       |     | D-S_NW_SL | 142.2                     | $1.1 \times 10^{-5}$ |
|               |                     |       |     | D-S_GL    | 111.6                     | $9.0 \times 10^{-6}$ |
|               |                     |       |     | GFC_SL    | 215.7                     | $1.7 \times 10^{-5}$ |
|               |                     |       |     | GFC_L     | 225.1                     | $1.8 \times 10^{-5}$ |
|               | 1.9998              | 10000 | 800 | B_NW_SL   | 311.4                     | $6.3 \times 10^{-6}$ |
|               |                     |       |     | D-S_NW_SL | 264.4                     | $5.3 \times 10^{-6}$ |
|               |                     |       |     | D-S_GL    | 225.1                     | $4.5 \times 10^{-6}$ |
|               |                     |       |     | GFC_SL    | 415.6                     | $8.3 \times 10^{-6}$ |
|               |                     |       |     | GFC_L     | 427.4                     | $8.6 \times 10^{-6}$ |
