# Supplementary material for: SILGGM: An extensive R package for efficient statistical inference in large-scale gene networks
Source: PubMed Central journal article supplement (PMC6107288; doi:10.1371/journal.pcbi.1006369), 2018-08-13
Supplement: pcbi.1006369.s007.pdf [file pcbi.1006369.s007.pdf]

**Table S1. Timings (in seconds) of B\_NW\_SL (SILGGM) and B\_NW\_SL (FastGGM)**

| <b>Average node degree</b> | <b><math>\pi</math></b> | <b><math>p</math></b> | <b><math>n</math></b> | <b>B_NW_SL (SILGGM)</b> | <b>B_NW_SL (FastGGM)</b> |
|----------------------------|-------------------------|-----------------------|-----------------------|-------------------------|--------------------------|
| 4.045                      | 0.005                   | 800                   | 400                   | 24.9                    | 36.6                     |
| 4.994                      | 0.005                   | 1000                  | 800                   | 72.8                    | 145.2                    |
| 4.970                      | 0.0025                  | 2000                  | 800                   | 411.7                   | 938.5                    |
| 5.0264                     | 0.001                   | 5000                  | 800                   | 5772.6                  | 8663.7                   |
| 5.0498                     | 0.0005                  | 10000                 | 800                   | 40080.6                 | 49650.2                  |
